# Supplementary material for: PhIP-Seq Reveals Autoantibodies for Ubiquitously Expressed Antigens in Viral Myocarditis
Source: MDPI journal article supplement (doi:10.3390/biology11071055), 2022-07-13
Supplement: s1 [file s1]

**Table S1. Detection of antibodies to known autoantigens in the mouse peptide library.**

| <b>Gene</b>    | <b>Autoantigen</b>                                              | <b>Naïve (n=10)</b> | <b>Infected (n=10)</b> |
|----------------|-----------------------------------------------------------------|---------------------|------------------------|
| <i>Myh6</i>    | Myosin-6                                                        | 1                   | 1                      |
| <i>Myh7</i>    | Myosin-7                                                        | 1                   | 4                      |
| <i>Tnni3</i>   | Troponin I, cardiac muscle (Fragment)                           | 5                   | 5                      |
| <i>Chrm2</i>   | Muscarinic acetylcholine receptor M2                            | 0                   | 0                      |
| <i>Slc25a4</i> | ADP/ATP translocase 1                                           | 0                   | 0                      |
| <i>Adrb1</i>   | Beta-1 adrenergic receptor                                      | 0                   | 0                      |
| <i>Bckdk</i>   | [3-methyl-2-oxobutanoate dehydrogenase<br>kinase, mitochondrial | 0                   | 0                      |
| <i>Agtr1a</i>  | Type-1 angiotensin II receptor                                  | 0                   | 1                      |
| <i>Actc1</i>   | Actin, alpha cardiac muscle 1 (Fragment)                        | 0                   | 0                      |
| <i>Lama4</i>   | Laminin subunit alpha-4                                         | 0                   | 1                      |
